# Supplementary material for: Oxygen-Releasing Antibacterial Nanofibrous Scaffolds for Tissue Engineering Applications
Source: MDPI journal article supplement (doi:10.3390/polym12061233), 2020-05-29

# Oxygen Releasing, Antibacterial Nanofibrous scaffolds for tissue engineering application

Tuerdimaimaiti Abudula <sup>1</sup>, Kalamegam Gauthaman <sup>2,3</sup>, Ahmed H. Hammad <sup>1,4</sup>, Kasturi Joshi Navare <sup>5</sup>, Ahmed A. Alshahrie <sup>1,6</sup>, Sidi A. Bencherif <sup>7-9</sup>, Ali Tamayol <sup>10</sup> and Adnan Memic <sup>1,\*</sup>

<sup>1</sup> Center of Nanotechnology, King Abdulaziz University, Jeddah 21589, Saudi Arabia; 1202908@gmail.com (T.A.); ahhhassan@kau.edu.sa (A.H.H.); amemic@kau.edu.sa (A.M.).

<sup>2</sup> Center of Excellence in Genomic Medicine Research, King Abdulaziz University, Jeddah, Saudi Arabia.

<sup>3</sup> Faculty of Medicine, AIMST University, Semeling, Bedong, Kedah, 08100, Malaysia; kgman@hotmail.com (K.G.).

<sup>4</sup> Electron Microscope and Thin Films Department, Physics Division, National Research Centre, Dokki, Giza 12622, Egypt; ah.hammad@nrc.sci.eg (A.H.H.)

<sup>5</sup> Department of Chemical Engineering, Northeastern University, Boston, MA 02115, USA; k.joshinavare@northeastern.edu (K.J.N.); s.bencherif@northeastern.edu (S.A.B.)

<sup>6</sup> Department of Physics, Faculty of Science, King Abdulaziz University, Jeddah 21589, Saudi Arabia; aalshahri@kau.edu.sa (A.A)

<sup>7</sup> Department of Bioengineering, Northeastern University, Boston, MA 02115, USA

<sup>8</sup> Harvard John A. Paulson School of Engineering and Applied Sciences, Harvard University, Cambridge, MA 02138, USA

<sup>9</sup> UMR CNRS 7338 Biomechanics and Bioengineering, University of Technology of Compiègne, Sorbonne University, 60200 Compiègne, France

<sup>10</sup> Department of Biomedical Engineering, University of Connecticut, Farmington, CT 06030, USA; atamayol@uchc.edu (A.T)

\* Correspondence: amemic@kau.edu.sa

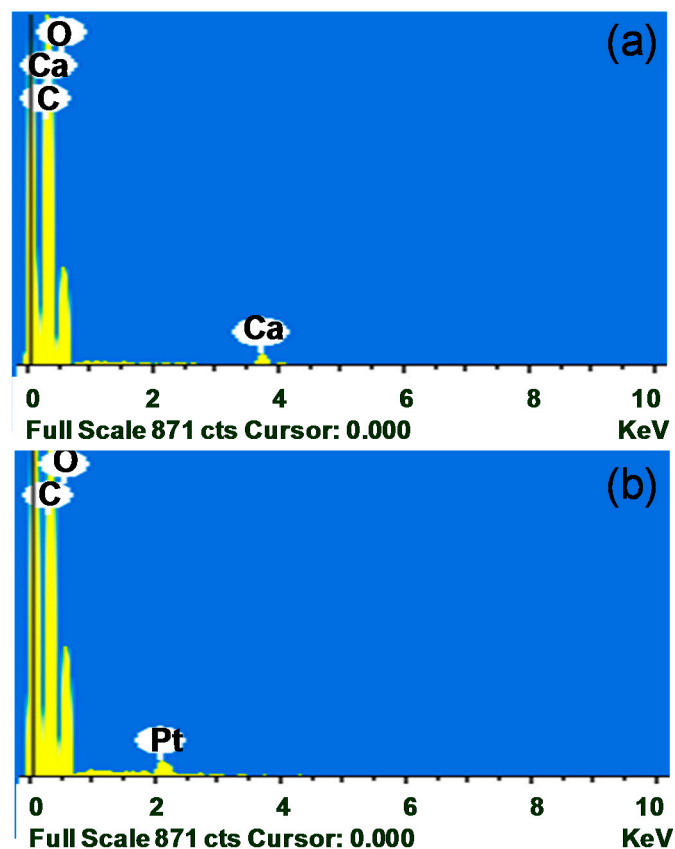

**Figure S1.** EDX spectra of the composite scaffolds before (a) and after (b) degradation in PBS. The results demonstrate complete release of CP from the scaffolds.

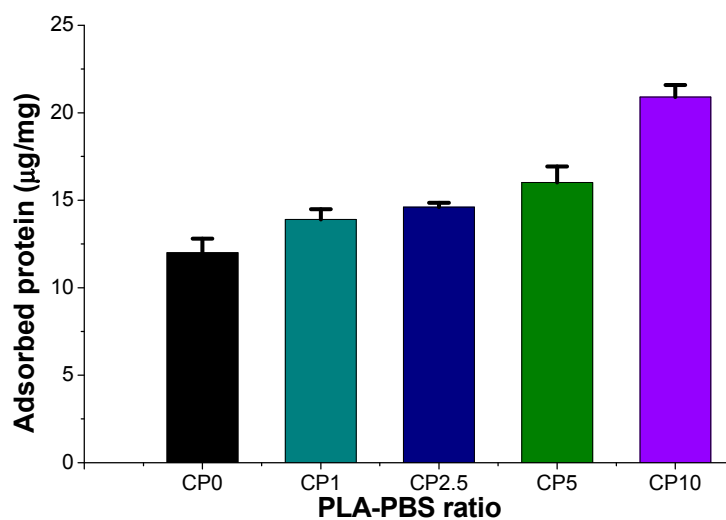

**Figure S2.** Protein adsorption capacity of the scaffolds, the data presented indicates the amount of adsorbed protein in each milligram of loaded scaffolds.

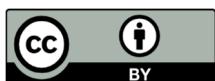

Supplement: s1 [file s1]
